# Supplementary material for: Body Size Adaptations to Altitudinal Climatic Variation in Neotropical Grasshoppers of the Genus Sphenarium (Orthoptera: Pyrgomorphidae)
Source: PLoS One. 2015 Dec 18;10(12):e0145248. doi: 10.1371/journal.pone.0145248 (PMC4686166; doi:10.1371/journal.pone.0145248)
Supplement: S1 Table — ID, locality identifier; VN, voucher number. A species identification based on Boyle [36] and Kevan [37,95] and by comparing our samples with museum specimens. B Intermediate form between S. m. mexicanum and S. m. histrio. C Intermediate form between S. p. purpurascens and S. p. minimum. (XLSX) [file pone.0145248.s001.xlsx]

## Sheet: Sheet1
					GenBank accession numbers
Locality	Elevation (m.a.s.l)	Locality identifier	Species A	Voucher number	CO1	CO2	12S	H3	ITS2
Mexico, Michoacán, Cerca de Coacolman Carr 120, 10-30-2010	1129	L1	S. borrei	ORSP01	KU146933	--	--	--	--
Mexico, Jalisco, Volcán Tequila, 10-5-2013	1237	L2	S. borrei	ORSP02	KU146934	KU147003	KU147050	KU147103	KU147150
Mexico, Michoacán, El Nopalito Carr 16, 10-1-2013	1870	L3	S. borrei	ORSP03	KU146935	KU147004	KU147051	KU147104	--
Mexico, Michoacán, Rumbo al Debanadero Carr 49, 10-7-2012	1047	L5	S. macrophallicum	ORSP04	KU146936	KU147005	KU147052	KU147105	KU147151
Mexico, Michoacán, Santa Barbara Carr 521, 10-12-2012	1607	L6	S. macrophallicum	ORSP05	KU146937	KU147006	KU147053	KU147106	KU147152
Mexico, Guerrero, Coyuca de Catalán Carr 134, 10-13-2012	207	L4	S. macrophallicum	ORSP06	KU146938	KU147007	KU147054	KU147107	KU147153
Mexico, Michoacán, Zicuirán Carr 120, 9-22-2012	239	L8	S. m. histrio	ORSP07	KU146939	--	KU147055	KU147108	KU147154
Mexico, Guerrero, Las Peñitas, 9-23-2012	36	L7	S. m. histrio	ORSP08	--	--	KU147056	--	--
Mexico, Guerrero, Río Papagayo Carr 200, 10-5-2011	56	L9	S. m. histrio	ORSP09	KU146940	KU147008	KU147057	KU147109	KU147155
Mexico, Chiapas, Salida de Arriaga Carr 200, 9-30-2012	25	L10	S. m. histrio	ORSP10	KU146941	KU147009	KU147058	KU147110	KU147156
Mexico, Chiapas, Las Margaritas Carr 190, 9-28-2012	1664	L13	S. m. histrio	ORSP11	KU146942	KU147010	KU147059	KU147111	KU147157
Mexico, Oaxaca, Cerca del Rosedal Carr 200 km 165, 10-5-2011	58	L11	S. m. histrio	ORSP12	KU146943	KU147011	KU147060	KU147112	--
Mexico, Oaxaca, Cozoaltepec, 9-30-2012	108	L12	S. m. histrio	ORSP13	KU146944	KU147012	KU147061	KU147113	KU147158
Mexico, Chiapas, EL Chorreadero, 9-26-2012	640	L15	S. m. histrio	ORSP14	KU146945	KU147013	KU147062	KU147114	--
Mexico, Guerrero, Palo Blanco Carr 95, 10-4-2011	1210	L17	S. m. histrio	ORSP15	KU146946	KU147014	KU147063	KU147115	KU147159
Mexico, Guerrero, Acahuizotla, 10-4-2011	1018	L16	S. m. histrio	ORSP16	KU146947	KU147015	KU147064	KU147116	KU147160
Mexico, Oaxaca, Pinotepa Nacional Carr 200, 10-5-2011	216	L18	S. m. histrio	ORSP17	KU146948	KU147016	KU147065	KU147117	KU147161
Mexico, Veracruz, Plan de Hayas, 11-3-2012	1145	L19	S. m. histrio	ORSP18	KU146949	KU147017	KU147066	KU147118	KU147162
Mexico, Veracruz, Plan de Hayas, 11-3-2012	1145	L19	S. m. histrio	ORSP19	KU146950	KU147018	KU147067	KU147119	KU147163
Mexico, Veracruz, Salida de Córdoba Carr 150, 9-25-2012	656	L20	S. m. mexicanum	ORSP20	KU146951	KU147019	KU147068	KU147120	KU147164
Mexico, Oaxaca, Parque eólico La ventosa Carr 200, 9-30-2012	46	L22	S. m. mexicanum	ORSP21	KU146952	KU147020	KU147069	KU147121	KU147165
Mexico, Veracruz, Minatitlán Carr 145D, 9-26-2012	15	L21	S. m. mexicanum	ORSP22	KU146953	KU147021	KU147070	KU147122	--
Mexico, Oaxaca, Tehuantepec Carr 190 km 244, 10-6-2011	83	L14	S. m. mexicanumB	ORSP23	KU146954	--	KU147071	--	--
			S. m. mexicanumB	ORSP24	KU146955	KU147022	KU147072	KU147123	--
Mexico, Veracruz, La Reforma, 11-3-2012	1291	L23	S. p. minimum	ORSP25	KU146956	KU147023	KU147073	KU147124	KU147166
Mexico, Veracruz, Coscomatepec Carr 143, 11-2-2012	1532	L24	S. p. minimum	ORSP26	KU146957	KU147024	KU147074	--	KU147167
Mexico, Veracruz, Maltrata Carr 150D, 9-25-2012	1789	L29	S. p. purpurascens	ORSP27	KU146958	KU147025	KU147075	--	--
Mexico, Oaxaca, Huajuapan-Tamazulapan Carr 190, 10-7-2011	1970	L33	S. p. purpurascens	ORSP28	KU146959	KU147026	KU147076	KU147125	KU147168
Mexico, Oaxaca, San Adrés Paxtlán Carr 175, 10-1-2012	2279	L39	S. p. purpurascens	ORSP29	KU146960	--	KU147077	--	--
Mexico, Guanajuato, Tarandacuao, 9-8-2008	1968	L32	S. p. purpurascens	ORSP30	KU146961	KU147027	KU147078	KU147126	KU147169
Mexico, Guanajuato, León , 10-6-2013	1848	L30	S. p. purpurascens	ORSP31	KU146962	KU147028	KU147079	KU147127	KU147170
Mexico, Guanajuato, Santa Catarina , 10-6-2013	1590	L26	S. p. purpurascens	ORSP32	KU146963	KU147029	KU147080	KU147128	KU147171
Mexico, Oaxaca, Cerca de Teotitlán Carr 131, 12-14-2013	913	L25	S. p. purpurascens	ORSP33	KU146964	KU147030	KU147081	KU147129	KU147172
Mexico, Tlaxcala, Atotonilco, 9-13-2008	2352	L42	S. p. purpurascens	ORSP34	KU146965	--	--	--	--
Mexico, Puebla, Cholula, 9-12-2008	2016	L34	S. p. purpurascens	ORSP35	KU146966	--	--	--	--
Mexico, Tlaxcala, Cacaxtla, 9-13-2008	2315	L40	S. p. purpurascens	ORSP36	KU146967	--	--	--	--
Mexico, México, Desviación a Amealco, 9-8-2008	2571	L43	S. p. purpurascens	ORSP37	KU146968	--	--	--	--
Mexico, Guanajuato, Rumbo a Guanajuato, 9-8-2008	2021	L35	S. p. purpurascens	ORSP38	KU146969	--	--	--	--
Mexico, Oaxaca, Monte Albán, 10-2-2008	1785	L28	S. p. purpurascens	ORSP39	KU146970	--	--	--	--
Mexico, Oaxaca, Salida de Oaxaca, 10-4-2008	1600	L27	S. p. purpurascens	ORSP40	KU146971	--	--	--	--
Mexico, Distrito Federal, Pedregal, 10-5-2008	2323	L41	S. p. purpurascens	ORSP41	KU146972	--	--	--	--
Mexico, Querétaro, El paraíso, 9-8-2008	1912	L31	S. p. purpurascens	ORSP42	KU146973	--	--	--	--
Mexico, Tlaxcala, Papalotla, 9-13-2008	2212	L37	S. p. purpurascens	ORSP43	KU146974	--	--	--	--
Mexico, Tlaxcala, Techachalco, 9-13-2008	2240	L38	S. p. purpurascens	ORSP44	KU146975	--	--	--	--
Mexico, Tlaxcala, Zacualpan, 9-13-2008	2204	L36	S. p. purpurascens	ORSP45	KU146976	--	--	--	--
Mexico, Michoacán, Las cañas, 11-1-2010	1336	L44	S. p. purpurascens	ORSP46	KU146977	KU147031	--	--	--
			S. p. purpurascens	ORSP47	KU146978	--	--	--	--
			S. p. purpurascens	ORSP48	KU146979	--	KU147082	KU147130	KU147173
Mexico, Oaxaca, Tehuacán, 10-3-2012	1694	L45	S. p. purpurascensC	ORSP49	KU146980	KU147032	KU147083	KU147131	KU147174
Mexico, Puebla, Carca de Tecamachalco, 12-7-2013	2095	L46	S. p. purpurascensC	ORSP50	KU146981	KU147033	KU147084	KU147132	KU147175
Mexico, México, Tejupilco Carr 134, 10-14-2012	1312	L48	S. rugosum	ORSP51	--	KU147034	KU147085	KU147133	KU147176
Mexico, Michoacán, Tuxpan-Ocurio Carr 15, 12-6-2013	1902	L49	S. rugosum	ORSP52	KU146982	KU147035	KU147086	KU147134	KU147177
Mexico, Guerrero, El Pinzán Morado Carr 134, 10-13-2012	730	L47	S. rugosum	ORSP53	KU146983	KU147036	KU147087	KU147135	KU147178
Mexico, Guerrero, Copalillo, 9-15-2011	967	L51	S. rugosum	ORSP54	--	--	KU147088	--	--
Mexico, Guerrero, Petaquillas, 10-4-2011	1128	L52	S. rugosum	ORSP55	KU146984	KU147037	KU147089	KU147136	KU147179
Mexico, Guerrero, Huajuapan de León, 10-7-2011	1680	L54	S. rugosum	ORSP56	KU146985	KU147038	KU147090	KU147137	KU147180
Mexico, Guerrero, Mirador Río Mezcala Carr 95, 10-4-2011	527	L50	S. rugosum	ORSP57	KU146986	KU147039	KU147091	KU147138	KU147181
Mexico, Guerrero, Xixila, 9-16-2011	1761	L56	S. rugosum	ORSP58	KU146987	--	--	--	--
Mexico, México, Malinalco, 9-12-2008	1731	L55	S. rugosum	ORSP59	KU146988	--	--	--	--
Mexico, Morelos, Yecapixtla, 9-12-2008	1644	L53	S. rugosum	ORSP60	KU146989	--	--	--	--
Mexico, Michoacán, Las Majadas Carr 120, 9-23-2012	301	L57	S. rugosum	ORSP61	KU146990	--	KU147092	KU147139	KU147182
Mexico, Jalisco, Pihuamo, 10-2-2013	800	L58	S. rugosum	ORSP62	KU146991	KU147040	KU147093	KU147140	KU147183
Mexico, Michoacán, El Cangrejo Carr 120, 9-22-2012	1075	L59	S. rugosum	ORSP63	KU146992	KU147041	KU147094	KU147141	KU147184
Mexico, Oaxaca, Cerca de Guelavía, 10-6-2011	1615	L62	S. variabile	ORSP64	KU146993	KU147042	KU147095	KU147142	--
Mexico, Oaxaca, San Juan Lajarcia, 10-6-2011	1185	L60	S. variabile	ORSP65	KU146994	KU147043	KU147096	KU147143	KU147185
Mexico, Oaxaca, Carr 175 Km 87, 12-13-2013	1568	L61	S. variabile	ORSP66	KU146995	KU147044	KU147097	KU147144	--
Mexico, Oaxaca, Carr 175 Km 158, 12-12-2013	2138	L63	S. variabile	ORSP67	KU146996	--	KU147098	KU147145	--
Guatemala, Sololá, Lago Altitlán, 11-4-2014		--	P. scudderi	ORPR01	KU146927	KU146998	--	--	--
Guatemala, Santa Rosa, Pueblo Nuevo Viñas, 11-6-2014	1090	--	P. scudderi	ORPR02	KU146928	KU146999	--	--	--
Guatemala, Chimaltenango, El Tejar, 11-7-2014	1783	--	P. scudderi	ORPR03	KU146929	--	--	--	--
Guatemala, Alta Verapaz, San Juan Chamelco, 11-5-2014	1400	--	P. scudderi	ORPR04	KU146930	KU147000	--	--	--
Guatemala, Alta Verapaz, Samác 12Km E Cobán, 1-3-2013	1314	--	P. scudderi	ORPR05	KU146931	KU147001	KU147047	KU147100	KU147147
Dominican Republic, Jaragua National Park, Chupadero, 6-14-2014		--	J. oviedensis	UCFC-OR1338	KU146926	KU146997	KU147046	KU147099	--
Mexico, Puebla, Tehuacán, 10-3-2012	1694	--	P. pueblensis	ORPY01	--	--	KU147048	KU147101	KU147148
Mexico, Guanajuato, 17.6 km E San Luis de la Paz, 10-6-2013		--	S. crassicornis	ORSC01	KU146932	KU147002	KU147049	KU147102	KU147149
Mexico, Hidalgo, Huautla, 12-5-2013		--	S. nobilis	ORST01	--	KU147045	--	KU147146	KU147186
Retrieved from GenBank	--	--	P. scudderi	--	--	--	Z93261.1	--	--
Retrieved from GenBank	--	--	M. xiangchengensis	--	NC_014450.1	NC_014450.1	NC_014450.1	--	--
Retrieved from GenBank	--	--	M. kingdoni	--	NC_023921.1	NC_023921.1	NC_023921.1	--	--
Retrieved from GenBank	--	--	M. xizangensis	--	NC_014451.1	NC_014451.1	NC_014451.1	--	--
Retrieved from GenBank	--	--	Y. coriacea	--	JQ301463.1	GQ421456.1	--	--	--
Retrieved from GenBank	--	--	S. gregaria gregaria	--	NC_013240.1	NC_013240.1	NC_013240.1	JQ796332.1	JQ796355.1
